# Supplementary material for: Reduced dosing and liability in methadone maintenance treatment by targeting oestrogen signal for morphine addiction
Source: PubMed Central journal article supplement (PMC5706516; doi:10.1111/jcmm.13266), 2017-07-12
Supplement: JCMM-21-3552-s001.pdf [file JCMM-21-3552-s001.pdf]

**Supplement Table 1. Characteristics of two cohorts study subjects on MMT.**

|                          | cohort-1<br>N=93                 | cohort-2<br>N=17  | cohort-1<br>N=150                 | cohort-2<br>N=35 | cohort-1<br>N=78                  | cohort-2<br>N=38  |
|--------------------------|----------------------------------|-------------------|-----------------------------------|------------------|-----------------------------------|-------------------|
|                          | maxdose $\leq$ 50; Mean $\pm$ SE |                   | 50 < maxdose < 100; Mean $\pm$ SE |                  | maxdose $\geq$ 100; Mean $\pm$ SE |                   |
| Gender                   |                                  |                   |                                   |                  |                                   |                   |
| male                     | 71                               | 13                | 124                               | 30               | 59                                | 23                |
| female                   | 22                               | 4                 | 26                                | 5                | 19                                | 15                |
| Age (y)                  | 42.08 $\pm$ 0.75                 | 42.59 $\pm$ 1.60  | 43.05 $\pm$ 0.61                  | 41.43 $\pm$ 1.10 | 40.21 $\pm$ 0.81                  | 37.47 $\pm$ 1.20  |
| BMI (Kg/M <sup>2</sup> ) | 22.83 $\pm$ 0.34                 | 24.11 $\pm$ 0.94  | 22.81 $\pm$ 0.24                  | 24.05 $\pm$ 0.69 | 22.35 $\pm$ 0.28                  | 23.57 $\pm$ 0.77  |
| Maxdose(mg/day)          | 38.33 $\pm$ 1.13                 | 41.18 $\pm$ 2.25  | 75.10 $\pm$ 0.88                  | 74.29 $\pm$ 1.94 | 115.06 $\pm$ 1.73                 | 133.29 $\pm$ 6.30 |
| SGOT                     | 40.80 $\pm$ 4.28                 | 38.56 $\pm$ 5.25  | 43.00 $\pm$ 2.39                  | 43.64 $\pm$ 3.45 | 46.25 $\pm$ 6.71                  | 47.52 $\pm$ 4.95  |
| SGPT                     | 48.14 $\pm$ 4.78                 | 29.1 $\pm$ 4.83   | 55.41 $\pm$ 4.32                  | 28.91 $\pm$ 3.05 | 56.53 $\pm$ 8.43                  | 39.96 $\pm$ 6.04  |
| r-GT                     | 46.12 $\pm$ 6.83                 | 57.42 $\pm$ 32.33 | 37.03 $\pm$ 2.36                  | 35.61 $\pm$ 6.07 | 37.25 $\pm$ 5.81                  | 58.37 $\pm$ 12.59 |
| HIV Ab (-/+)             | 91/0                             | 9/1               | 145/5                             | 21/3             | 76/2                              | 24/2              |

## Supplemental Table 2, Primer list for SNP and qRT-PCR

Primers for SNP genotyping

| Gene (SNP_ID)        | 1st-PCR Primer                     | 2nd-PCR Primer                     |
|----------------------|------------------------------------|------------------------------------|
| OPRk-1 (rs6473799)   | 5'-ACGTTGGATGCAGGGAAAATGCAGTCCTTC  | 5'-ACGTTGGATGAGAGCTCCCAAACCTCATCTC |
| OPRL-1 (rs7271530)   | 5'-ACGTTGGATGCCTGTTAGAGAGGGATTATG  | 5'-ACGTTGGATGGAGCTTGGCACAGGTATTTG  |
| OPRL-1 (rs6010717)   | 5'-ACGTTGGATGACGTGGATGGCACCATCTTC  | 5'-ACGTTGGATGGCGAGCCTTCGGAGAATTAT  |
| OPRD1 (rs2236860)    | 5'-ACGTTGGATGTGGTATGAATCCCTGCTCTG  | 5'-ACGTTGGATGGAAACTGAGGCTCAAAGAGG  |
| OPRL (rs2229205)     | 5'-ACGTTGGATGACGTCCGCACGTCCAGCAAA  | 5'-ACGTTGGATGAACGGGAACACCGACAACAG  |
| CYP2C19 (rs11528090) | 5'-ACGTTGGATGTGGACGGTTTGTGTTGAAGG  | 5'-ACGTTGGATGCTCAGTCTACCTCCCTATCC  |
| CYP2C19 (rs6583954)  | 5'-ACGTTGGATGTTAGGAGTACTGCTGTGGAG  | 5'-ACGTTGGATGTGGAATCCACCTAGAACTCC  |
| CYP2B6 (rs16974799)  | 5'-ACGTTGGATGGGTTCCAGCGAATTGTGTAGG | 5'-ACGTTGGATGCATCTGCAATGTGAGGAGTG  |
| CYP2B6 (rs3760657)   | 5'-ACGTTGGATGCAGCATGGACTTTCCTGAAC  | 5'-ACGTTGGATGGAGCACCCAATCTTAGTGTC  |
| CYP1A2 (rs4646425)   | 5'-ACGTTGGATGCTTCCTCCAATAACACCAG   | 5'-ACGTTGGATGTCTGGTGTACGTTGCTTCC   |

Primers for RT-PCR

| Gene name | Forward Primer            | Reverse Primer             |
|-----------|---------------------------|----------------------------|
| CYP1a2    | 5'-GGCCACTTCGAACCAGTCAGCC | 5'-ATCTCCTCGCTCTTCCGGGGG   |
| CYP2b10   | 5'-CTTGGCCCGCTGATTGGGCTG  | 5'-TGCCTTGGAGCCCTGGAGATTT  |
| CYP2c37   | 5'-TCCTGGGCTGTGCTCCTTGC   | 5'-TGCAAATCTGCAACCAAGGGCTG |
| CYP2d22   | 5'-TCAGAACGCACCGGTAGCTGGA | 5'-CCGGTCGGCAGTCTCATGGC    |

**Supplemental Table 3, The association of ERE-SNPs in MMT Max**

| ERE-SNP site               | Genotypes | ≤50 (n=79)      | 51-99 (n=127)   | ≥100 (n=65)     | p-value         |
|----------------------------|-----------|-----------------|-----------------|-----------------|-----------------|
| OPRk-1 (rs6473799)         | AA        | 68(30.0)        | 103(45.4)       | 56(24.7)        | 0.4472          |
|                            | GG        | 10(23.3)        | 24(55.8)        | 9(20.9)         |                 |
| OPRL-1 (rs7271530)         | TT        | 22(24.7)        | 47(52.8)        | 20(22.5)        | 0.0492          |
|                            | CC        | 14(33.3)        | 12(28.6)        | 16(38.1)        |                 |
|                            | CT        | 43(31.4)        | 67(48.9)        | 27(19.7)        |                 |
| OPRL-1 (rs6010717)         | GG        | 30(25.2)        | 61(51.3)        | 28(23.5)        | 0.1278          |
|                            | CC        | 12(50.0)        | 6(25.0)         | 6(25.0)         |                 |
|                            | CG        | 36(29.3)        | 59(48.0)        | 28(22.8)        |                 |
| OPRD-1 (rs2236860)         | GG        | 61(29.8)        | 94(45.9)        | 50(24.4)        | 0.6183          |
|                            | AA        | 1(20.0)         | 4(80.0)         | 0(0)            |                 |
|                            | AG        | 17(28.3)        | 29(48.3)        | 14(23.3)        |                 |
| OPRL (rs2229205)           | CC        | 60(30.5)        | 95(48.2)        | 42(21.3)        | 0.1649          |
|                            | TT        | 0(0)            | 3(42.9)         | 4(57.1)         |                 |
|                            | CT        | 19(28.8)        | 29(43.9)        | 18(27.3)        |                 |
| CYP2C19 (rs11529090)       | TT        | 33(25.4)        | 62(47.7)        | 35(26.9)        | 0.5222          |
|                            | GG        | 14(37.8)        | 15(40.5)        | 8(21.6)         |                 |
|                            | GT        | 29(30.9)        | 46(48.9)        | 19(20.2)        |                 |
| CYP2C19 (rs6583954)        | CC        | 34(29.6)        | 53(46.1)        | 28(24.4)        | 0.997           |
|                            | TT        | 9(30.0)         | 14(46.7)        | 7(23.3)         |                 |
|                            | CT        | 36(29.0)        | 60(48.4)        | 28(22.6)        |                 |
| <b>CYP2B6 (rs16974799)</b> | <b>CC</b> | <b>41(23.8)</b> | <b>83(48.3)</b> | <b>48(27.9)</b> | <b>0.0441 *</b> |
|                            | <b>TT</b> | <b>5(55.6)</b>  | <b>3(33.3)</b>  | <b>1(11.1)</b>  |                 |
|                            | <b>CT</b> | <b>33(37.1)</b> | <b>41(46.1)</b> | <b>15(16.9)</b> |                 |
| CYP2B6 (rs3760657)         | AA        | 61(30.1)        | 86(42.4)        | 56(27.6)        | 0.0909          |
|                            | GG        | 2(2.6)          | 6(4.0)          | 1(2.4)          |                 |
|                            | AG        | 15(26.3)        | 34(59.7)        | 8(14.0)         |                 |
| CYP1A2 (rs4646425)         | CC        | 69(29.7)        | 109(47.0)       | 54(23.3)        | 0.8728          |
|                            | TT        | 2(40.0)         | 2(40.0)         | 1(20.0)         |                 |
|                            | CT        | 7(21.9)         | 16(50)          | 9(28.1)         |                 |
